# Supplementary figures and images for: Progression Risk Score Estimation Based on Immunostaining Data in Oral Cancer Using Unsupervised Hierarchical Clustering Analysis: A Retrospective Study in Taiwan
Source: MDPI journal article supplement (doi:10.3390/jpm11090908), 2021-09-13

(A) Negative control (case 1)

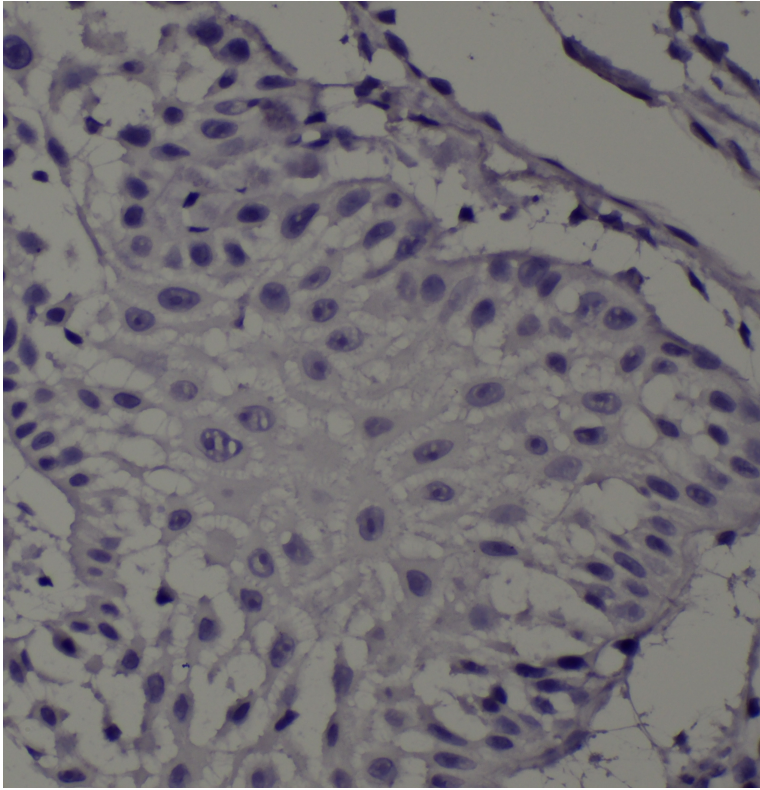

(B) Negative control (case 2)

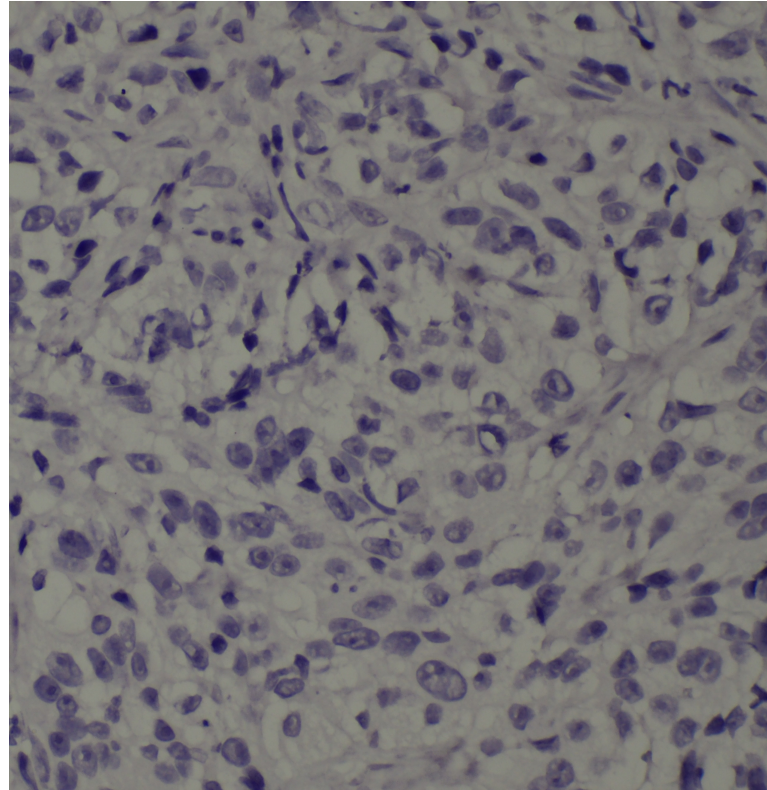

Supplement: s1 [file s1]
